# Supplementary material for: Marine spatial planning makes room for offshore aquaculture in crowded coastal waters
Source: PubMed Central journal article supplement (PMC5838171; doi:10.1038/s41467-018-03249-1), 2018-03-05
Supplement: 41467_2018_3249_MOESM3_ESM.pdf [file 41467_2018_3249_MOESM3_ESM.pdf]

## Description of Additional Supplementary Files

File Name: Supplementary Data 1

Description: **Spatial data layers.** Source, year and weblink for spatial data layers used in analyses and by component models.

File Name: Supplementary Data 2

Description: **Model parameters and variables.** Model parameters and other variables used in component models, including values and supporting references.
